# Supplementary material for: The ice-nucleating activity of African mineral dust in the Caribbean boundary layer
Source: Copernicus journal article supplement (doi:10.5194/acp-2022-57), 2022-02-22
Supplement: Supplementary file [file acp-2022-57-AC1-supplement.pdf]

## Response to referee 1

We thank the referee for their comments. Our responses are in blue text.

### **General comment:**

*The low K-Feldspar content is shown to be the most likely reason for the disparity between the observed  $n_s$  activity and parametrizations (and I agree). One of the main reasons for the low K-Feldspar contribution is then given by the transport route patterns and the potential source region of the dust in West Africa (Sahel in Mauritania and Mali). The transport of mineral dust to the Caribbean and its key features are even specifically introduced in detail in section 2. However, I wonder why the actually back trajectory analysis is then cut very short in the manuscript. From the way the arguments are presented, I expected a robust trajectory and source region analysis to confirm these hypotheses. Instead the individual back trajectories are only shown in the supplement and it is only stated in one sentence that they generally support the presented idea. I think a detailed analysis would strengthen the manuscript and may drive the point home completely.*

The short answer is that back trajectories cannot readily be used to infer source regions in Africa. Trajectories for the Caribbean MBL typically do not intersect with Africa (see the figures in the SI, but also the one included below), yet they systematically contain dust. So, the dust must enter the MBL at some point between Africa and the Caribbean through processes that are not resolved in a simple back trajectory analysis. Hence, it is not possible (or at least very challenging) to use such an analysis to say anything about African source regions. This is why we relied on other evidence from the literature on source regions of dust found in the Caribbean.

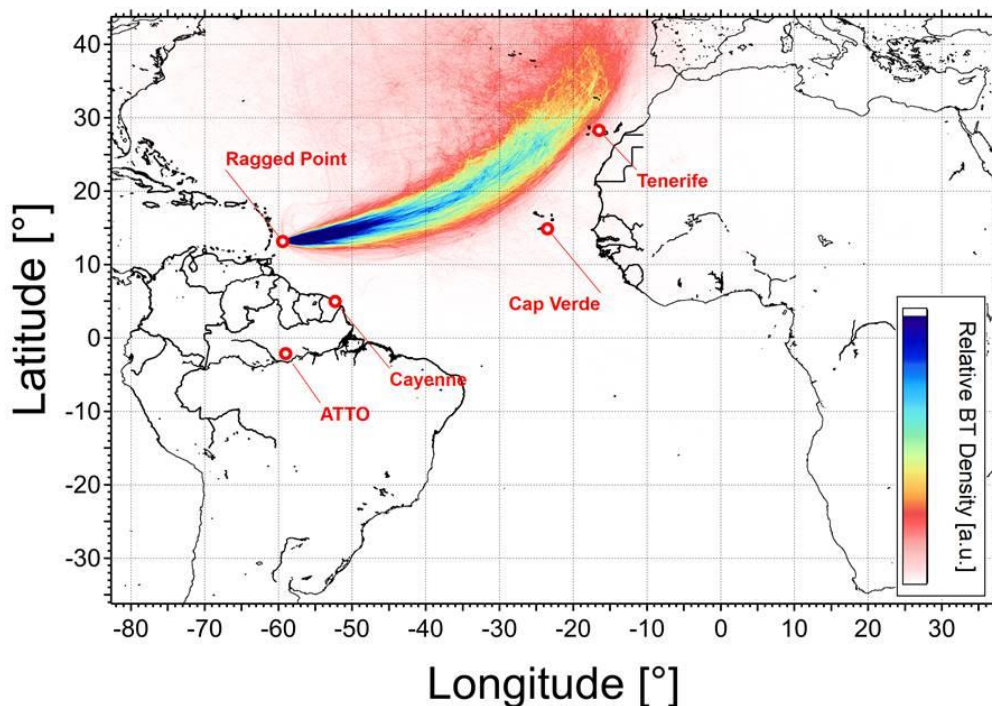

Figure 1. Back trajectory frequency plot for 200 m above Ragged Point. The trajectories are run for 9 days. The period is 10 years, run across all seasons.

We have updated the pertinent paragraph in section 6.1 to make it clear why we didn't do more with the back trajectories:

"We examined back trajectories corresponding to our samples and while they are consistent with the fact that there was generally a westerly flow and that the SAL is derived from the African continent, trajectories do not allow us to resolve African source regions. As discussed in section 2, the transport of dust from African source regions to the Caribbean MBL is complex and poorly represented in models. Trajectories relevant for the Caribbean MBL often do not intercept the African coast; instead these trajectories often have a strong northerly component (see SI Figure S6). Hence, dust is not transported directly from source to the Caribbean, instead processes such as the mixing of dust down from the SAL into the MBL in moist convective erosion at the base of the SAL somewhere between Africa and the Caribbean must take place (Reid et al., 2003; Prospero and Carlson, 1972). Hence, the trajectory models cannot be used to indicate specific sources of African dust."

**Specific comments:**

1. Fig. 1: *Maybe make the background color green for the whole "Caribbean"? I think it looks a little weird as it is, or is this somehow intended?*

We intended this to indicate islands, but have changed it to solid green.

2. P5 L138: *Is the name "IcePod" an abbreviation?*

No. It is a name.

3. P8 L238: *It is unclear to me which size distributions (SMPS+APS or SEM) were finally used to calculate  $n_s$ . Please specify. Edit: Reading the results, I now see that the APS and SMPS were used, but it is probably best to give this information in the method section as well.*

This has now been made very clear

4. Fig. 3: *I find it rather unusual to add a legend as a separate panel to a figure. I would suggest to add the legend below the panels a-d in a line-like format or to the right of these panels.*

Changed

*Further, the numbers on each size bin composition bar are very difficult to read. Maybe you can also increase the width of the figure for better readability?*

We will supply a vector graphic file for final typesetting where this will be clearer.

*Also on the second to last sentence of the caption there are two .. at the end.*

Corrected

*Moreover, as the last sentence is more interpretation of the results (however obvious it may be) than a description of what is seen in the figure, I would probably leave it out of the caption.*

Removed

5. P9 L276: *From Fig. 5 it seems that this concentration of  $100 \mu\text{g m}^{-3}$  was not measured by the APS for some reason, but only by another method that is not described here but in another paper. I think this should probably be mentioned here. Especially, since the GLOMAP model line in Fig. 5 does not seem to see this peak in aerosol mass. Accordingly, it is maybe even unnecessary (?) trying to explain in detail why no INP concentration increase was observed when the aerosol data is partly missing.*

This was a minor point and as the referee says, our data was unfortunately incomplete at this time, so we have removed the sentences

6. P9 L278: *On what observation is this statement about the expected shift of 2°C per factor of 5 in surface area based? (Fig. 7? Literature?)*

This was based on the K-feldspar parameterisation. But, we have removed these lines.

*Also where does this factor of 5 in surface area come from? At this point aerosol mass concentrations were discussed only.*

We assumed that the surface area would scale with the mass, which is obviously a crude assumption. We have removed these lines.

7. *Fig. 4: Shouldn't the line about the back trajectories and Fig. S6 be in the main text instead of the caption of a figure? I think the back trajectories are a key element for the story of the manuscript (see general comment).*

Now referred to in the text.

*Panel c: Black, white and grey symbols are not indicated in the legend (although it is clear what they represent from looking at panel b).*

We didn't include an item in the key for panel c because as the referee says it is clear what they are from panel b.

8. *Fig. 5a: It is unclear to me why this unusual INP "concentration" time series of the temperature at which the concentration was 0.01 INP L<sup>-1</sup> was chosen. Is this somehow considered a critical threshold for Caribbean clouds? Also looking at Fig. 4a 0.01 L<sup>-1</sup> seems to be a concentration at which all data points are close to or at the background concentration, if I understand the open symbols correctly. Why not choose a higher concentration (i.e., 0.1 L<sup>-1</sup>) to circumvent this issue? Why not simply show the concentration at a given temperature (e.g., -20 °C, etc.)?*

There was an error here. This should be the INP concentration at 0.1 L<sup>-1</sup>. We have corrected the main paper and the SI.

The reason we have plotted this quantity rather than a concentration at a particular T is twofold: i) because our data sits roughly between an upper and lower limit in INP conc and shifts to higher or lower temperatures depending on activity it is not always possible to plot a temperature time series because we cannot always report data at a single T in all runs (we might be able to do this for this dataset at around -23 C). ii) What is more relevant, the concentration at some arbitrary T or the T at which this concentration is reached? I would argue that for clouds it is the latter. We picked 0.1 L<sup>-1</sup> because it is well above our baseline and is a concentration where we expect to start to see substantial changes to a cloud. We recently used this in Porter et al. (2022)

*Furthermore, I am having trouble understanding the green symbols: I guess the length of the vertical bar indicates the sampling time, correct?*

Yes, correct. This has been made clear in the caption.

*Further, sometimes there are up to three data points at one specific time, is this correct? It might be worthwhile to intercompare these samples in some more detail? It seems from this figure that there are some differences up to ~3 °C for this depicted concentration of 0.01 L<sup>-1</sup>. How does this translate in variability of the INP concentration at one specific temperature?*

Correct, there was some overlap. We had some technical problems with our samplers (they cut out at random times), which prevented us from sampling for set durations of time. Our

original intention was to have two filter samples in parallel, one for INP and one for SEM or a spare for INP analysis. But, this wasn't possible, hence the sampling durations varied considerably. Because of the erratic sampling we didn't have many cases where we had samples taken at exactly the same time. The quoted temperature uncertainty of the instrument is 0.4°C, hence the differences appear to be significant. The only time we had almost identical sampling was on the 4<sup>th</sup> August and the results of the two were well within the quoted uncertainty. We have added the following text to section 5.1 where we had removed text based on the referee's other suggestions:

"Figure 5 illustrates the time series of the temperature at which the INP concentration was 0.1 L-1, again showing that the INP spectra were relatively invariant through the campaign. For technical reasons we performed very few parallel samplings where the same volume of air was sampled over the same period of time on multiple filters (we had technical problems with our samplers). However, on the 4<sup>th</sup> August we did manage to do this and found excellent reproducibility between the two samples, with the temperature at 0.1 INP L-1 being within the 0.4°C instrument uncertainty (Whale et al., 2015). The variability in the INP spectra of ~3 K would therefore appear to be related to the activity of the aerosol. In addition, the aerosol (and dust) mass concentrations were also relatively constant during the campaign (Figure 5), as were the meteorological parameters of pressure, relative humidity and temperature (see Figure S7). The variability in dust mass concentration in our campaign in 2017 was substantially less than that in other years (Zuidema et al., 2019), hence a campaign in a different year may have found more variability in INP concentrations."

*9. Fig. 6: Some data points seem to indicate an increase in INP concentration after the heat treatment. Do you have any ideas what may have caused this? I wonder if this is a real effect caused by contamination or something else, or just variability in the measurements. If the latter were true then the language may need to be toned down a little when explaining the differences in the text for the samples when the heat treatment did decrease the INP activity. (Although the explanations are plausible.)*

In our recent paper on characterising the heat tests (Daily et al., 2022) we started plotting heat test data using box and whisker plots. This is much better than the 1:1 plot that we used here. We have updated the figure and this gives a much clearer picture of what the heat tests show. Yes, in a few samples there was a marginally higher freezing T, but this was on the order of our experimental uncertainty.

*Furthermore, what do the triangles mean in the figure? (Is it just to indicate the heat labile sample? If so, I wonder why the other mentioned sample is not also shown as a triangle.)*

There was no significance.

*10. P10 L301 / Fig. 4c: Welti et al. (2018) present their data in detailed form for temperatures down to -16°C. Looking at the frequency distribution of measured INP concentrations at -16 °C (Fig. 5 of Welti et al., 2018) it can be seen that concentrations were usually lower than 0.1 L-1. Considering this, to me it seems that extending the data from Welti et al. (2018) would result in a reasonably well comparable concentration range to what was measured in this manuscript. Maybe the generally higher concentrations from Price et al. (2018) are rather caused by the different altitude and possibly higher dust load, different dust composition or different particle size distribution at that height resulting from different transport patterns (or simply temporal variability)?*

We have removed the reference to -15 C and now state: “hence the actual INP concentrations may have extended to greater values at the lower end of their temperature range”.

11. P12 L362: *I think this paragraph is really relevant to explain the observations. I agree to the presented reasoning. However, I wonder if these arguments could be strengthened by providing a figure in the manuscript itself. For example, maybe showing a back trajectory frequency distribution from this campaign (or for summer months in general) superimposed on a mineralogy map (as described in the text) to really illustrate the point. Generally, I wondered why the information from the back trajectories were not featured more prominently here (there isn't even a mention of the Fig. S6 here), as they would be a key indicator that the hypothesis for the lower INP mineral dust activity were sound. Also maybe you can elaborate some more why you have low confidence in the back trajectories?*

We have addressed this in response to the ‘general point’ above.

12. P14 L429 / Fig. 8: *I wonder why you don't show the K-Feldspar-content “corrected” GLOMAP prediction in the figure (e.g., as an average line).*

We had this in an earlier version and it caused confusion, hence we decided to leave it out.

13. Fig. S4: *I am not familiar with this method. Could you briefly describe it (here or in the manuscript) and explain what this figure means? What are negative counts? How do you estimate the relative mineral content? What is the grey and blue line? What is the x-axis?*

Fig S4 has been improved, with better axis labelling. We have also expanded the caption to give some brief indication of how to interpret the plot. The caption now reads:

**‘Figure S4:** Powder X-ray diffraction analysis and Rietveld refinement of aerosol collected in rain water from the 3<sup>rd</sup>-4<sup>th</sup> of August 2017. The proportion of each mineral identified in the sample is shown in the key. The limit of detection of this technique was ~2 wt%, hence K-feldspar was below this limit, thus defining an upper limit. X-ray diffraction combined with Rietveld refinement analysis is a technique for quantifying the proportions of the crystalline components of a sample. Crystalline components have a set of sharp Bragg peaks that are characteristic of a particular crystalline material. The X-ray diffractometer (Bruker D8) was equipped with a source supplying X-rays at 1.54060 Å. The diffraction pattern is shown in blue, while the fitted Rietveld pattern (a combination of the patterns associated with a range of minerals) is shown in pink. The positions of the Bragg peaks are associated with each mineral are shown below the patterns and are colour coded according to the key. The grey line is the residual (i.e. the difference between the fitted and measured patterns.’

14. Fig. S9: *Is this mass fraction calculated for the surface or a mean column density?*

This is at the surface. This has been added to the caption.

**Technical comments:**

15. *References should be put in parentheses ( ) instead of square brackets [ ] according to the journal guidelines*

Corrected

16. P3 L74: *Missing space between “sources. In”*

Corrected

17. P4 L97: *“rides above” – I am not sure about this phrasing. Maybe rephrase?*

Changed to 'resides'

18. P6 L162: → section 3.3

Corrected

19. P6 L176: → Möhler et al (2008)

Corrected

20. P7 L191: what do you mean by "where the square brackets indicate the concentration"? Also there is a right parenthesis but no left one.

This has been corrected. We have changed the way we represent concentration to be consistent with Copernicus rules.

21. P9 L277 / Fig. 5: There is no explicitly labeled panel a) and b) in Fig. 5 yet.

Corrected

22. P11 L331: SAL layer → SAL has the word layer already in it

Corrected

23. P11 L337: The title of chapter 6 is rather long. Maybe it can be rephrased to a more concise title?

Shortened to 'Why African dust in the MBL in Barbados has a relatively low ice-nucleating activity'

24. P14 L409: → Vergara-Temprado et al. (2017)

Corrected

25. P14 L426: → Fig. S9

Corrected

26. Fig. S5: The error bars reach out of the figure. Also, there is no mention of Fig. S5 in the manuscript yet.

Corrected the figure.

We have added '(in Figure S5 we also show the predicted INP concentration associated with plagioclase, albite and quartz as well as K-feldspar, showing that K-feldspar contributes more to the ice-nucleating activity of dust in this location than the other minerals)'

27. Fig. S6: There is a weird line next to the caption and red underscore symbols after "2000" and "4000" in the caption.

Corrected

28. Fig. S7: Panels e and f are already in the manuscript and do not need to be shown here again. The panels are not correctly assigned in the caption.

We feel it is important to include all panels in order that we can compare them. Caption corrected.

**References**



Daily, M. I., Tarn, M. D., Whale, T. F., and Murray, B. J.: An evaluation of the heat test for the ice-nucleating ability of minerals and biological material, *Atmos. Meas. Tech.*, 15, 2635-2665, 10.5194/amt-15-2635-2022, 2022.

Porter, G. C. E., Adams, M. P., Brooks, I. M., Ickes, L., Karlsson, L., Leck, C., Salter, M. E., Schmale, J., Siegel, K., Sikora, S. N. F., Tarn, M. D., Vüllers, J., Wernli, H., Zieger, P., Zinke, J., and Murray, B. J.: Highly Active Ice-Nucleating Particles at the Summer North Pole, *Journal of Geophysical Research: Atmospheres*, 127, e2021JD036059, <https://doi.org/10.1029/2021JD036059>, 2022.

Prospero, J. M. and Carlson, T. N.: VERTICAL AND AREAL DISTRIBUTION OF SAHARAN DUST OVER WESTERN EQUATORIAL NORTH-ATLANTIC OCEAN, *Journal of Geophysical Research*, 77, 5255-&, 10.1029/JC077i027p05255, 1972.

Reid, J. S., Kinney, J. E., Westphal, D. L., Holben, B. N., Welton, E. J., Tsay, S. C., Eleuterio, D. P., Campbell, J. R., Christopher, S. A., Colarco, P. R., Jonsson, H. H., Livingston, J. M., Maring, H. B., Meier, M. L., Pilewskie, P., Prospero, J. M., Reid, E. A., Remer, L. A., Russell, P. B., Savoie, D. L., Smirnov, A., and Tanre, D.: Analysis of measurements of Saharan dust by airborne and ground-based remote sensing methods during the Puerto Rico Dust Experiment (PRIDE), *Journal of Geophysical Research-Atmospheres*, 108, 10.1029/2002jd002493, 2003.

Whale, T. F., Murray, B. J., O'Sullivan, D., Wilson, T. W., Umo, N. S., Baustian, K. J., Atkinson, J. D., Workneh, D. A., and Morris, G. J.: A technique for quantifying heterogeneous ice nucleation in microlitre supercooled water droplets, *Atmos. Meas. Tech.*, 8, 2437-2447, 10.5194/amt-8-2437-2015, 2015.

Zuidema, P., Alvarez, C., Kramer, S. J., Custals, L., Izaguirre, M., Sealy, P., Prospero, J. M., and Blades, E.: Is Summer African Dust Arriving Earlier to Barbados? The Updated Long-Term In Situ Dust Mass Concentration Time Series from Ragged Point, Barbados, and Miami, Florida, *Bulletin of the American Meteorological Society*, 100, 1981-1986, 10.1175/bams-d-18-0083.1, 2019.
